# Supplementary material for: Structural Basis for the Activation and Target Site Specificity of CDC7 Kinase
Source: PubMed Central journal article supplement (PMC7416108; doi:10.1016/j.str.2020.05.010), 2020-08-04
Supplement: mmc1.pdf [file mmc1.pdf]

**Structure, Volume 28**

**Supplemental Information**

**Structural Basis for the Activation and Target**

**Site Specificity of CDC7 Kinase**

**Samual D. Dick, Stefania Federico, Siobhan M. Hughes, Valerie E. Pye, Nicola O'Reilly, and Peter Cherepanov**

**Figure S1**

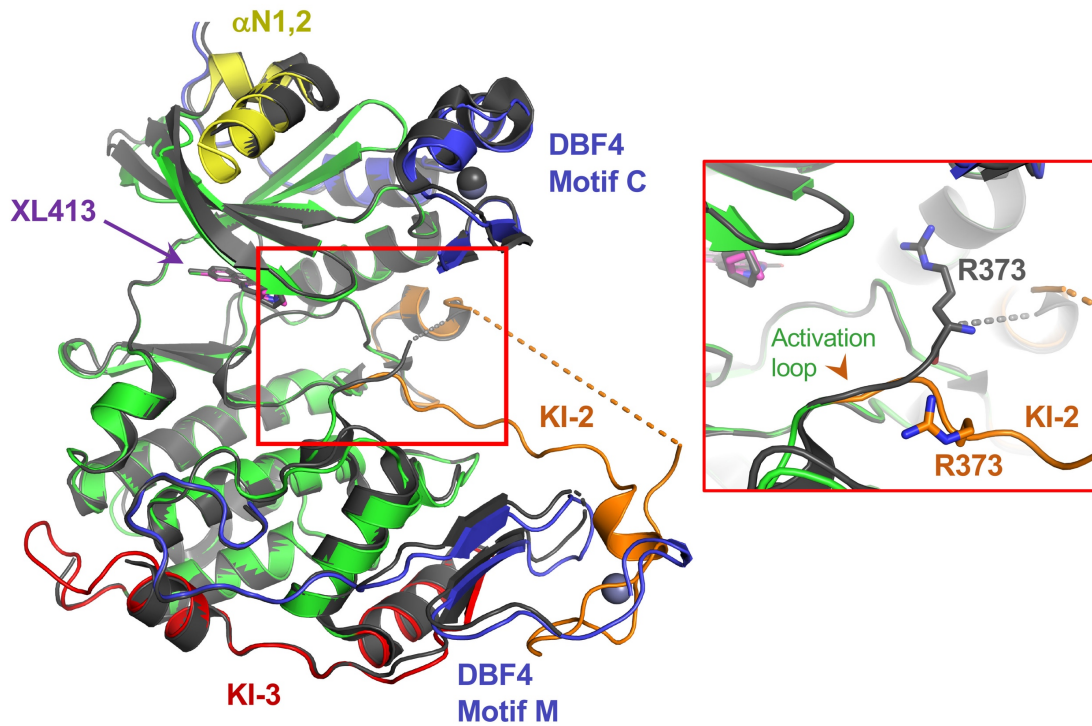

**Figure S1.** Comparison of the CDC7-DBF4 constructs with  $\Delta 228-359$  (PDB ID 4F9C, grey) and  $\Delta 228-345$  (this work, colored as in Fig. 2A) deletions in KI-2. Related to Figure 2A. Protein and the bound inhibitor (XL413) are depicted as cartoons and sticks, respectively. A zoomed view of the CDC7 activation segment region is shown in inset; note that the more extensive deletion in KI-2 leads to a disorder of the CDC7 activation segment.

**Figure S2**

**A**

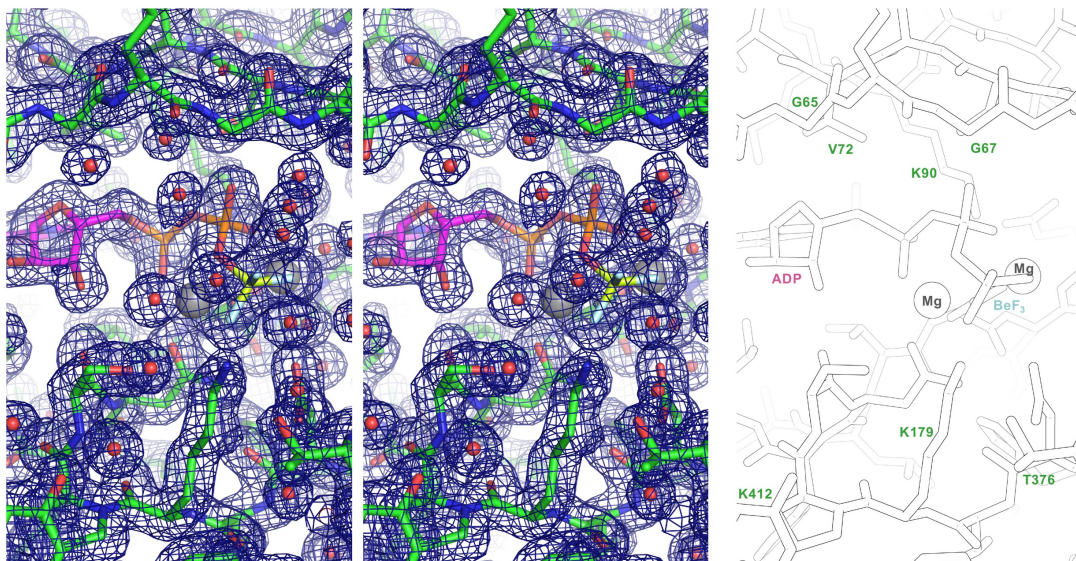

**B**

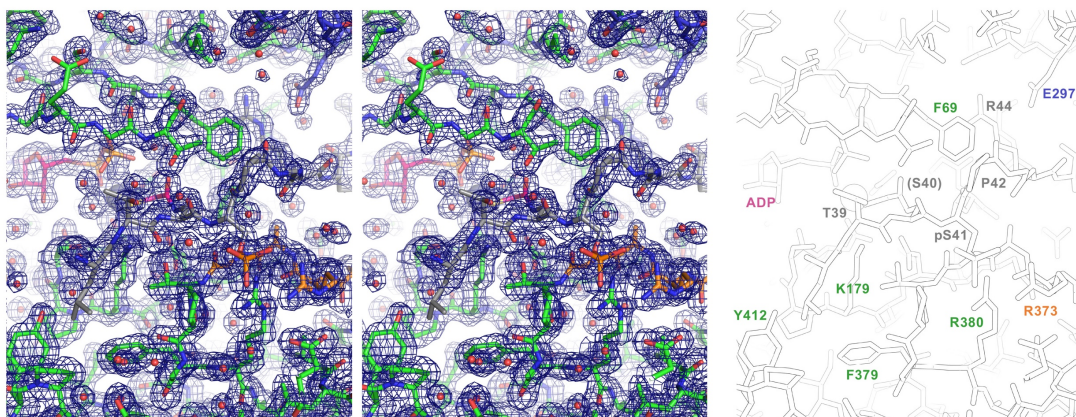

**Figure S2. Stereo views of the final electron density maps of ADP-BeF<sub>3</sub><sup>-</sup> (A) and bisubstrate (B) complexes. Related to Figures 2C and 3A. Weighted 2Fo-Fc maps, contoured at 1  $\sigma$ , are shown as blue mesh. Protein residues and ligands are depicted as sticks, water molecules as small red spheres and metal ions as grey spheres. Nucleotides and selected amino acid residues are indicated on the black and white images to the right.**
